# Supplementary material
Source: PubMed Central journal article supplement (PMC7431089)
Supplement: pnas.2005634117.sapp.pdf [file pnas.2005634117.sapp.pdf]

## **Supporting information**

### **Approximating the relationship between regression coefficients and relative risks for continuous and discretised characteristics**

The following approximation is used to relate a genotype's regression coefficient,  $\beta$ , to the log relative risk associating the genotype to a threshold characteristic defined by  $t$ :

$$\ln \text{RR} \approx \frac{\beta}{(1-p)s} \left( 0.8 + 0.68 \frac{t}{s} + 0.064 \frac{t^2}{s^2} \right) - \frac{\beta^2}{(1-p)^2 s^2} \left( 0.34 + 0.064 \frac{t}{s} - 0.0128 \frac{t^2}{s^2} \right).$$

This is derived as follows. The relative risk is defined in this case as

$$\text{RR} = \frac{\Pr(Y > t | g = 1)}{\Pr(Y > t | g = 0)}, \quad (\text{S1})$$

where  $Y$  is the continuous phenotype and  $g$  is the genotype status (1 if the individual possesses the 'risk' genotype and 0 otherwise). For simplicity we assume that  $g=1$  implies  $aa$  and  $g=0$  implies  $ab/bb$  (or vice versa), or  $g=1$  implies  $ab$  and  $g=0$  implies  $aa/bb$  (over or underdominance).

We assume that  $Y$  is normally distributed with variance 1 and mean 0. If  $g=1$ ,  $Y$  is normal with mean  $\mu_1$ , and if  $g=0$ ,  $Y$  has mean  $\mu_0 = -u_1 \Pr(g=1) / (1 - \Pr(g=1))$ . Each distribution has variance  $s^2 = 1 - \text{var}(g)(\mu_1 - \mu_0)^2$ . It can be shown that the regression coefficient  $\beta$ , also known as the average effect, is related to  $\mu_1$  via  $\mu_1 = \beta(1-p)$ , where  $p$  is the allele frequency, when  $g=1$  is dominant. Similar relationships can be obtained under recessive and overdominant inheritance models. We proceed using the dominant model for now ( $g=1$  implies  $aa$  or  $ab$  and  $g=0$  implies  $bb$ ), which is also a good approximation of the additive model when the dominant allele is not too common. We next produce a second order Taylor series approximation for the relative risk. The following is made easier if we analyse  $\tilde{Y} = (Y - \mu_0) / s$  in place of  $Y$  by making the substitutions  $\tilde{t} = (t - \mu_0) / s$ ,  $\tilde{\mu}_1 = (\mu_1 - \mu_0) / s$ , and  $\tilde{\mu}_0 = (\mu_0 - \mu_0) / s = 0$ . This forces the denominator in Equation S1 to be independent from  $\tilde{\mu}_1$ , and it would otherwise depend on  $\mu_1$  through  $s$ .

The first derivative of the log relative risk with respect to  $\tilde{\mu}_1$  is then

$$f'_t(\tilde{\mu}_1) = \frac{\phi(\tilde{t} - \tilde{\mu}_1)}{1 - \Phi(\tilde{t} - \tilde{\mu}_1)},$$

where  $\phi(x)$  is the standard normal density function,  $\Phi(x)$  the standard cumulative normal distribution and  $f_t(\tilde{\mu}_1) = \ln RR$  (Equation S1).

The following approximation to the cumulative normal distribution by Hart<sup>1</sup>,

$$\Phi(x) = 1 - \frac{\phi(x)}{x + 0.8e^{-0.4x}},$$

then allows one to write

$$f'_t(\tilde{\mu}_1) \approx \tilde{t} - \tilde{\mu}_1 + 0.8e^{-0.4(\tilde{t} - \tilde{\mu}_1)}.$$

Differentiating a second time gives

$$f''_t(\tilde{\mu}_1) \approx 0.32e^{-0.4(\tilde{t} - \tilde{\mu}_1)} - 1.$$

Combining the derivatives into a Taylor series for  $\beta \approx 0$  gives

$$\ln RR \approx (0.8\tilde{\mu}_1 + 0.16\tilde{\mu}_1^2)e^{-0.4\tilde{t}} + \tilde{t}\tilde{\mu}_1 - 0.5\tilde{\mu}_1^2.$$

Further simplification is achieved via second order Taylor approximation of  $e^{-0.4\tilde{t}}$  with  $\tilde{t}$  in the neighborhood of zero:

$$e^{-0.4\tilde{t}} \approx 1 - 0.4\tilde{t} + 0.08\tilde{t}^2,$$

giving

$$\ln RR \approx \tilde{\mu}_1(0.8 + 0.68\tilde{t} + 0.064\tilde{t}^2) - \tilde{\mu}_1^2(0.34 + 0.064\tilde{t} - 0.0128\tilde{t}^2).$$

Converting  $\beta$  to  $\tilde{\mu}_1 = (\beta(1-p) - \mu_0)/s$ , which equals  $\beta(1-p)\left(1 - \frac{\Pr(g=1)}{\Pr(g=1)-1}\right)/s$ , under the dominance model gives

$$\ln RR \approx \frac{\beta}{(1-p)s} (0.8 + 0.68\tilde{t} + 0.064\tilde{t}^2) - \frac{\beta^2}{(1-p)^2 s^2} (0.34 + 0.064\tilde{t} - 0.0128\tilde{t}^2),$$

as  $\Pr(g=1) = 1 - (1-p)^2$ . In practice, using  $t/s$  in place of  $\tilde{t}$  maintains reasonable accuracy, as shown in Figure 2 and Equation 1.

The similarity of this approximation to results obtained using distribution functions, when  $\beta > 0$ , is demonstrated in Figure 2. The approximation is invalid when  $t$  becomes moderately large and negative, but in this case the relative risk can be inverted.

## **References**

- 1 Hart, R. G. A formula for the approximation of definite integrals of the normal distribution function. *Math. Comp.* **11**, 265 (1957).
